# Supplementary material
Source: publisher figshare collection journal article supplement (https://acs.figshare.com/ndownloader/files/4200616)
Supplement: Supplementary file 1 [file 4200616]

  
data_090104cm 
  
_audit_creation_method            SHELXL-97 
_chemical_name_systematic 
; 
 ? 
; 
_chemical_name_common             ? 
_chemical_melting_point           ? 
_chemical_formula_moiety          ? 
_chemical_formula_sum 
 'C16 H12 Br N O3' 
_chemical_formula_weight          346.18 
  
loop_ 
 _atom_type_symbol 
 _atom_type_description 
 _atom_type_scat_dispersion_real 
 _atom_type_scat_dispersion_imag 
 _atom_type_scat_source 
 'C'  'C'   0.0033   0.0016 
 'International Tables Vol C Tables 4.2.6.8 and 6.1.1.4' 
 'H'  'H'   0.0000   0.0000 
 'International Tables Vol C Tables 4.2.6.8 and 6.1.1.4' 
 'O'  'O'   0.0106   0.0060 
 'International Tables Vol C Tables 4.2.6.8 and 6.1.1.4' 
 'N'  'N'   0.0061   0.0033 
 'International Tables Vol C Tables 4.2.6.8 and 6.1.1.4' 
 'Br'  'Br'  -0.2901   2.4595 
 'International Tables Vol C Tables 4.2.6.8 and 6.1.1.4' 
  
_symmetry_cell_setting            Monoclinic 
_symmetry_space_group_name_H-M    P2(1) 
  
loop_ 
 _symmetry_equiv_pos_as_xyz 
 'x, y, z' 
 '-x, y+1/2, -z' 
  
_cell_length_a                    7.9944(11) 
_cell_length_b                    6.2207(9) 
_cell_length_c                    14.801(2) 
_cell_angle_alpha                 90.00 
_cell_angle_beta                  103.384(2) 
_cell_angle_gamma                 90.00 
_cell_volume                      716.05(18) 
_cell_formula_units_Z             2 
_cell_measurement_temperature     298(2) 
_cell_measurement_reflns_used     2843 
_cell_measurement_theta_min       2.62 
_cell_measurement_theta_max       22.68 
  
_exptl_crystal_description        needle 
_exptl_crystal_colour             colorless 
_exptl_crystal_size_max           0.40 
_exptl_crystal_size_mid           0.04 
_exptl_crystal_size_min           0.02 
_exptl_crystal_density_meas       0 
_exptl_crystal_density_diffrn     1.606 
_exptl_crystal_density_method     'not measured' 
_exptl_crystal_F_000              348 
_exptl_absorpt_coefficient_mu     2.879 
_exptl_absorpt_correction_type    none 
_exptl_absorpt_correction_T_min   0.3922 
_exptl_absorpt_correction_T_max   0.9447 
_exptl_absorpt_process_details    ? 
  
_exptl_special_details 
; 
 ? 
; 
  
_diffrn_ambient_temperature       298(2) 
_diffrn_radiation_wavelength      0.71073 
_diffrn_radiation_type            MoK\a 
_diffrn_radiation_source          'fine-focus sealed tube' 
_diffrn_radiation_monochromator   graphite 
_diffrn_measurement_device_type   'CCD area detector' 
_diffrn_measurement_method        'phi and omega scans' 
_diffrn_detector_area_resol_mean  ? 
_diffrn_standards_number          ? 
_diffrn_standards_interval_count  ? 
_diffrn_standards_interval_time   ? 
_diffrn_standards_decay_%         ? 
_diffrn_reflns_number             7876 
_diffrn_reflns_av_R_equivalents   0.0286 
_diffrn_reflns_av_sigmaI/netI     0.0565 
_diffrn_reflns_limit_h_min        -9 
_diffrn_reflns_limit_h_max        10 
_diffrn_reflns_limit_k_min        -7 
_diffrn_reflns_limit_k_max        7 
_diffrn_reflns_limit_l_min        -18 
_diffrn_reflns_limit_l_max        18 
_diffrn_reflns_theta_min          1.41 
_diffrn_reflns_theta_max          26.99 
_reflns_number_total              3043 
_reflns_number_gt                 2466 
_reflns_threshold_expression      >2sigma(I) 
  
_computing_data_collection        'Bruker SMART' 
_computing_cell_refinement        'Bruker SMART' 
_computing_data_reduction         'Bruker SAINT' 
_computing_structure_solution     'SHELXS-97 (Sheldrick, 1990)' 
_computing_structure_refinement   'SHELXL-97 (Sheldrick, 1997)' 
_computing_molecular_graphics     'Bruker SHELXTL' 
_computing_publication_material   'Bruker SHELXTL' 
  
_refine_special_details 
; 
 Refinement of F^2^ against ALL reflections.  The weighted R-factor wR and 
 goodness of fit S are based on F^2^, conventional R-factors R are based 
 on F, with F set to zero for negative F^2^. The threshold expression of 
 F^2^ > 2sigma(F^2^) is used only for calculating R-factors(gt) etc. and is 
 not relevant to the choice of reflections for refinement.  R-factors based 
 on F^2^ are statistically about twice as large as those based on F, and R- 
 factors based on ALL data will be even larger. 
; 
  
_refine_ls_structure_factor_coef  Fsqd 
_refine_ls_matrix_type            full 
_refine_ls_weighting_scheme       calc 
_refine_ls_weighting_details 
 'calc w=1/[\s^2^(Fo^2^)+(0.0519P)^2^+0.0000P] where P=(Fo^2^+2Fc^2^)/3' 
_atom_sites_solution_primary      direct 
_atom_sites_solution_secondary    difmap 
_atom_sites_solution_hydrogens    geom 
_refine_ls_hydrogen_treatment     mixed 
_refine_ls_extinction_method      none 
_refine_ls_extinction_coef        ? 
_refine_ls_abs_structure_details 
 'Flack H D (1983), Acta Cryst. A39, 876-881' 
_refine_ls_abs_structure_Flack    0.017(12) 
_refine_ls_number_reflns          3043 
_refine_ls_number_parameters      193 
_refine_ls_number_restraints      2 
_refine_ls_R_factor_all           0.0527 
_refine_ls_R_factor_gt            0.0404 
_refine_ls_wR_factor_ref          0.1016 
_refine_ls_wR_factor_gt           0.0959 
_refine_ls_goodness_of_fit_ref    1.018 
_refine_ls_restrained_S_all       1.018 
_refine_ls_shift/su_max           0.001 
_refine_ls_shift/su_mean          0.000 
  
loop_ 
 _atom_site_label 
 _atom_site_type_symbol 
 _atom_site_fract_x 
 _atom_site_fract_y 
 _atom_site_fract_z 
 _atom_site_U_iso_or_equiv 
 _atom_site_adp_type 
 _atom_site_occupancy 
 _atom_site_symmetry_multiplicity 
 _atom_site_calc_flag 
 _atom_site_refinement_flags 
 _atom_site_disorder_assembly 
 _atom_site_disorder_group 
Br1 Br 0.09473(5) 1.00513(10) 0.45376(3) 0.07077(19) Uani 1 1 d . . . 
C1 C 0.2620(5) 0.8326(7) 0.4148(2) 0.0456(8) Uani 1 1 d . . . 
C2 C 0.4174(5) 0.9259(6) 0.4122(2) 0.0426(8) Uani 1 1 d . . . 
H2 H 0.4435 1.0649 0.4341 0.051 Uiso 1 1 calc R . . 
C3 C 0.5334(5) 0.8077(6) 0.3762(2) 0.0427(8) Uani 1 1 d . . . 
H3 H 0.6374 0.8693 0.3721 0.051 Uiso 1 1 calc R . . 
C4 C 0.4960(4) 0.5984(6) 0.3461(2) 0.0393(7) Uani 1 1 d . . . 
C5 C 0.3392(4) 0.5072(8) 0.3532(2) 0.0466(7) Uani 1 1 d . . . 
H5 H 0.3142 0.3655 0.3351 0.056 Uiso 1 1 calc R . . 
C6 C 0.2226(5) 0.6261(7) 0.3868(2) 0.0504(9) Uani 1 1 d . . . 
H6 H 0.1177 0.5666 0.3905 0.061 Uiso 1 1 calc R . . 
C7 C 0.6195(5) 0.4588(5) 0.3119(2) 0.0431(9) Uani 1 1 d . . . 
C8 C 0.7380(4) 0.5474(5) 0.2535(2) 0.0371(7) Uani 1 1 d . . . 
H8 H 0.8558 0.5533 0.2915 0.045 Uiso 1 1 calc R . . 
C9 C 0.6094(4) 0.7398(6) 0.1251(2) 0.0411(8) Uani 1 1 d . . . 
C10 C 0.7342(4) 0.4068(5) 0.1670(2) 0.0402(7) Uani 1 1 d . . . 
H10 H 0.6745 0.2716 0.1725 0.048 Uiso 1 1 calc R . . 
C11 C 0.9112(4) 0.3584(6) 0.1495(2) 0.0394(7) Uani 1 1 d . . . 
C12 C 0.9959(4) 0.5053(9) 0.1057(2) 0.0542(8) Uani 1 1 d . . . 
H12 H 0.9446 0.6366 0.0860 0.065 Uiso 1 1 calc R . . 
C13 C 1.1581(5) 0.4567(9) 0.0910(3) 0.0658(14) Uani 1 1 d . . . 
H13 H 1.2151 0.5549 0.0614 0.079 Uiso 1 1 calc R . . 
C14 C 1.2321(5) 0.2634(9) 0.1205(3) 0.0634(12) Uani 1 1 d . . . 
H14 H 1.3397 0.2300 0.1104 0.076 Uiso 1 1 calc R . . 
C15 C 1.1509(5) 0.1203(8) 0.1641(3) 0.0642(11) Uani 1 1 d . . . 
H15 H 1.2037 -0.0098 0.1845 0.077 Uiso 1 1 calc R . . 
C16 C 0.9888(5) 0.1662(7) 0.1787(3) 0.0536(10) Uani 1 1 d . . . 
H16 H 0.9331 0.0664 0.2082 0.064 Uiso 1 1 calc R . . 
N1 N 0.6269(3) 0.5406(5) 0.09704(17) 0.0454(7) Uani 1 1 d D . . 
H1 H 0.588(4) 0.518(8) 0.0389(10) 0.055 Uiso 1 1 d D . . 
O1 O 0.6312(5) 0.2693(5) 0.3292(2) 0.0766(10) Uani 1 1 d . . . 
O2 O 0.5385(4) 0.8943(5) 0.08310(17) 0.0590(7) Uani 1 1 d . . . 
O3 O 0.6873(3) 0.7582(4) 0.21778(14) 0.0417(5) Uani 1 1 d . . . 
  
loop_ 
 _atom_site_aniso_label 
 _atom_site_aniso_U_11 
 _atom_site_aniso_U_22 
 _atom_site_aniso_U_33 
 _atom_site_aniso_U_23 
 _atom_site_aniso_U_13 
 _atom_site_aniso_U_12 
Br1 0.0633(3) 0.0798(3) 0.0805(3) 0.0043(3) 0.0397(2) 0.0193(3) 
C1 0.044(2) 0.057(2) 0.0408(17) 0.0011(15) 0.0202(15) 0.0046(17) 
C2 0.051(2) 0.0358(19) 0.0454(16) -0.0003(13) 0.0208(15) -0.0036(14) 
C3 0.048(2) 0.0401(19) 0.0439(17) 0.0035(14) 0.0188(15) -0.0045(15) 
C4 0.0456(18) 0.0383(18) 0.0366(14) 0.0032(13) 0.0146(13) -0.0015(15) 
C5 0.0531(19) 0.0414(18) 0.0456(15) 0.000(2) 0.0120(13) -0.012(2) 
C6 0.0415(19) 0.064(2) 0.0482(18) -0.0015(18) 0.0158(15) -0.0112(18) 
C7 0.058(2) 0.034(2) 0.0415(15) 0.0039(13) 0.0186(14) 0.0023(15) 
C8 0.0389(16) 0.034(2) 0.0386(14) 0.0019(13) 0.0090(12) 0.0006(13) 
C9 0.0392(19) 0.050(2) 0.0367(15) 0.0014(15) 0.0135(14) 0.0005(15) 
C10 0.0360(17) 0.0389(18) 0.0479(17) -0.0042(14) 0.0142(14) -0.0005(14) 
C11 0.0387(18) 0.0440(19) 0.0381(15) -0.0059(14) 0.0139(13) 0.0019(15) 
C12 0.0479(18) 0.060(2) 0.0587(18) 0.013(2) 0.0205(14) 0.005(2) 
C13 0.047(2) 0.092(4) 0.067(2) 0.005(2) 0.0299(18) -0.007(2) 
C14 0.039(2) 0.087(3) 0.065(2) -0.026(2) 0.0146(18) 0.010(2) 
C15 0.054(2) 0.057(3) 0.079(3) -0.017(2) 0.009(2) 0.012(2) 
C16 0.052(2) 0.044(2) 0.065(2) -0.0039(18) 0.0139(18) 0.0042(18) 
N1 0.0365(14) 0.057(2) 0.0397(12) -0.0102(14) 0.0017(11) 0.0060(14) 
O1 0.119(3) 0.0393(17) 0.093(2) 0.0191(15) 0.068(2) 0.0160(17) 
O2 0.0715(18) 0.0580(16) 0.0483(13) 0.0123(12) 0.0157(12) 0.0202(14) 
O3 0.0559(15) 0.0367(12) 0.0356(11) 0.0017(9) 0.0169(10) -0.0039(11) 
  
_geom_special_details 
; 
 All esds (except the esd in the dihedral angle between two l.s. planes) 
 are estimated using the full covariance matrix.  The cell esds are taken 
 into account individually in the estimation of esds in distances, angles 
 and torsion angles; correlations between esds in cell parameters are only 
 used when they are defined by crystal symmetry.  An approximate (isotropic) 
 treatment of cell esds is used for estimating esds involving l.s. planes. 
; 
  
loop_ 
 _geom_bond_atom_site_label_1 
 _geom_bond_atom_site_label_2 
 _geom_bond_distance 
 _geom_bond_site_symmetry_2 
 _geom_bond_publ_flag 
Br1 C1 1.905(4) . ? 
C1 C6 1.364(6) . ? 
C1 C2 1.379(5) . ? 
C2 C3 1.383(5) . ? 
C2 H2 0.9300 . ? 
C3 C4 1.386(5) . ? 
C3 H3 0.9300 . ? 
C4 C5 1.402(5) . ? 
C4 C7 1.489(5) . ? 
C5 C6 1.370(6) . ? 
C5 H5 0.9300 . ? 
C6 H6 0.9300 . ? 
C7 O1 1.205(4) . ? 
C7 C8 1.525(5) . ? 
C8 O3 1.437(4) . ? 
C8 C10 1.545(4) . ? 
C8 H8 0.9800 . ? 
C9 O2 1.212(4) . ? 
C9 N1 1.324(5) . ? 
C9 O3 1.373(4) . ? 
C10 N1 1.446(4) . ? 
C10 C11 1.526(5) . ? 
C10 H10 0.9800 . ? 
C11 C16 1.370(5) . ? 
C11 C12 1.384(6) . ? 
C12 C13 1.397(5) . ? 
C12 H12 0.9300 . ? 
C13 C14 1.366(7) . ? 
C13 H13 0.9300 . ? 
C14 C15 1.350(7) . ? 
C14 H14 0.9300 . ? 
C15 C16 1.392(6) . ? 
C15 H15 0.9300 . ? 
C16 H16 0.9300 . ? 
N1 H1 0.857(10) . ? 
  
loop_ 
 _geom_angle_atom_site_label_1 
 _geom_angle_atom_site_label_2 
 _geom_angle_atom_site_label_3 
 _geom_angle 
 _geom_angle_site_symmetry_1 
 _geom_angle_site_symmetry_3 
 _geom_angle_publ_flag 
C6 C1 C2 122.3(4) . . ? 
C6 C1 Br1 119.5(3) . . ? 
C2 C1 Br1 118.1(3) . . ? 
C1 C2 C3 118.4(3) . . ? 
C1 C2 H2 120.8 . . ? 
C3 C2 H2 120.8 . . ? 
C2 C3 C4 120.6(3) . . ? 
C2 C3 H3 119.7 . . ? 
C4 C3 H3 119.7 . . ? 
C3 C4 C5 119.1(4) . . ? 
C3 C4 C7 123.1(3) . . ? 
C5 C4 C7 117.7(3) . . ? 
C6 C5 C4 120.3(4) . . ? 
C6 C5 H5 119.9 . . ? 
C4 C5 H5 119.9 . . ? 
C1 C6 C5 119.3(4) . . ? 
C1 C6 H6 120.3 . . ? 
C5 C6 H6 120.3 . . ? 
O1 C7 C4 121.5(3) . . ? 
O1 C7 C8 116.5(3) . . ? 
C4 C7 C8 122.0(3) . . ? 
O3 C8 C7 112.3(3) . . ? 
O3 C8 C10 105.2(2) . . ? 
C7 C8 C10 111.7(3) . . ? 
O3 C8 H8 109.2 . . ? 
C7 C8 H8 109.2 . . ? 
C10 C8 H8 109.2 . . ? 
O2 C9 N1 130.7(3) . . ? 
O2 C9 O3 119.7(3) . . ? 
N1 C9 O3 109.6(3) . . ? 
N1 C10 C11 114.3(3) . . ? 
N1 C10 C8 99.3(2) . . ? 
C11 C10 C8 114.3(3) . . ? 
N1 C10 H10 109.5 . . ? 
C11 C10 H10 109.5 . . ? 
C8 C10 H10 109.5 . . ? 
C16 C11 C12 119.3(4) . . ? 
C16 C11 C10 119.2(3) . . ? 
C12 C11 C10 121.5(3) . . ? 
C11 C12 C13 120.1(4) . . ? 
C11 C12 H12 119.9 . . ? 
C13 C12 H12 119.9 . . ? 
C14 C13 C12 119.3(4) . . ? 
C14 C13 H13 120.3 . . ? 
C12 C13 H13 120.3 . . ? 
C15 C14 C13 120.8(4) . . ? 
C15 C14 H14 119.6 . . ? 
C13 C14 H14 119.6 . . ? 
C14 C15 C16 120.4(4) . . ? 
C14 C15 H15 119.8 . . ? 
C16 C15 H15 119.8 . . ? 
C11 C16 C15 120.0(4) . . ? 
C11 C16 H16 120.0 . . ? 
C15 C16 H16 120.0 . . ? 
C9 N1 C10 113.7(3) . . ? 
C9 N1 H1 116(4) . . ? 
C10 N1 H1 130(3) . . ? 
C9 O3 C8 108.4(2) . . ? 
  
loop_ 
 _geom_torsion_atom_site_label_1 
 _geom_torsion_atom_site_label_2 
 _geom_torsion_atom_site_label_3 
 _geom_torsion_atom_site_label_4 
 _geom_torsion 
 _geom_torsion_site_symmetry_1 
 _geom_torsion_site_symmetry_2 
 _geom_torsion_site_symmetry_3 
 _geom_torsion_site_symmetry_4 
 _geom_torsion_publ_flag 
C6 C1 C2 C3 2.8(5) . . . . ? 
Br1 C1 C2 C3 -174.3(2) . . . . ? 
C1 C2 C3 C4 -1.9(5) . . . . ? 
C2 C3 C4 C5 -0.4(5) . . . . ? 
C2 C3 C4 C7 -176.3(3) . . . . ? 
C3 C4 C5 C6 2.0(5) . . . . ? 
C7 C4 C5 C6 178.1(3) . . . . ? 
C2 C1 C6 C5 -1.3(5) . . . . ? 
Br1 C1 C6 C5 175.8(3) . . . . ? 
C4 C5 C6 C1 -1.2(5) . . . . ? 
C3 C4 C7 O1 142.2(4) . . . . ? 
C5 C4 C7 O1 -33.7(5) . . . . ? 
C3 C4 C7 C8 -37.6(5) . . . . ? 
C5 C4 C7 C8 146.5(3) . . . . ? 
O1 C7 C8 O3 165.9(3) . . . . ? 
C4 C7 C8 O3 -14.3(4) . . . . ? 
O1 C7 C8 C10 48.0(4) . . . . ? 
C4 C7 C8 C10 -132.2(3) . . . . ? 
O3 C8 C10 N1 -18.8(3) . . . . ? 
C7 C8 C10 N1 103.3(3) . . . . ? 
O3 C8 C10 C11 103.3(3) . . . . ? 
C7 C8 C10 C11 -134.6(3) . . . . ? 
N1 C10 C11 C16 -148.4(3) . . . . ? 
C8 C10 C11 C16 98.0(4) . . . . ? 
N1 C10 C11 C12 32.3(4) . . . . ? 
C8 C10 C11 C12 -81.2(4) . . . . ? 
C16 C11 C12 C13 0.4(6) . . . . ? 
C10 C11 C12 C13 179.7(3) . . . . ? 
C11 C12 C13 C14 -0.2(6) . . . . ? 
C12 C13 C14 C15 -0.5(6) . . . . ? 
C13 C14 C15 C16 0.9(6) . . . . ? 
C12 C11 C16 C15 -0.1(5) . . . . ? 
C10 C11 C16 C15 -179.3(3) . . . . ? 
C14 C15 C16 C11 -0.6(6) . . . . ? 
O2 C9 N1 C10 174.9(4) . . . . ? 
O3 C9 N1 C10 -5.6(4) . . . . ? 
C11 C10 N1 C9 -106.8(3) . . . . ? 
C8 C10 N1 C9 15.3(4) . . . . ? 
O2 C9 O3 C8 171.5(3) . . . . ? 
N1 C9 O3 C8 -8.1(4) . . . . ? 
C7 C8 O3 C9 -104.4(3) . . . . ? 
C10 C8 O3 C9 17.3(3) . . . . ? 
  
loop_ 
 _geom_hbond_atom_site_label_D 
 _geom_hbond_atom_site_label_H 
 _geom_hbond_atom_site_label_A 
 _geom_hbond_distance_DH 
 _geom_hbond_distance_HA 
 _geom_hbond_distance_DA 
 _geom_hbond_angle_DHA 
 _geom_hbond_site_symmetry_A 
C3 H3 O1  0.93 2.57 3.097(5) 116.7 1_565 
N1 H1 O2  0.857(10) 2.007(17) 2.838(3) 163(4) 2_645 
  
_diffrn_measured_fraction_theta_max    0.995 
_diffrn_reflns_theta_full              26.99 
_diffrn_measured_fraction_theta_full   0.995 
_refine_diff_density_max    0.565 
_refine_diff_density_min   -0.286 
_refine_diff_density_rms    0.062 
